**(a)**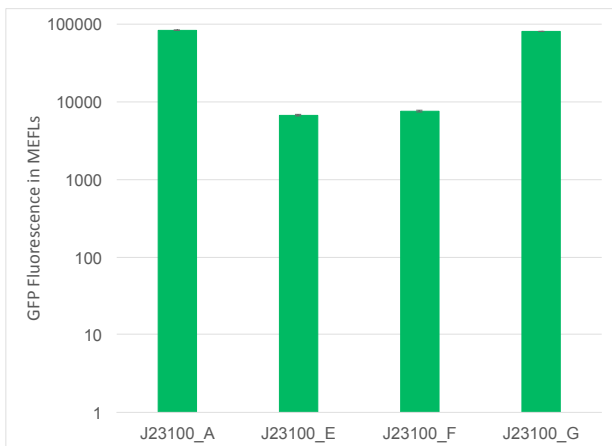**(b)**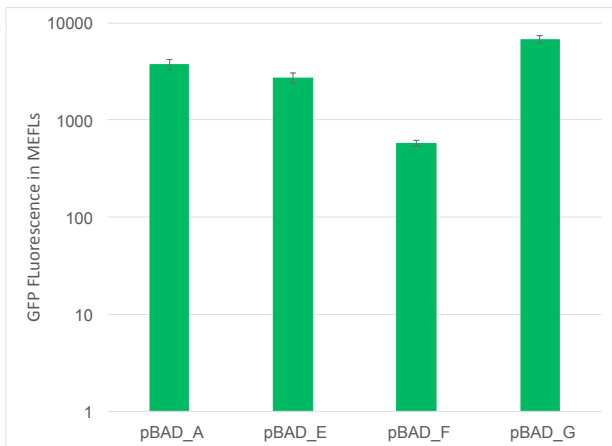**(c)**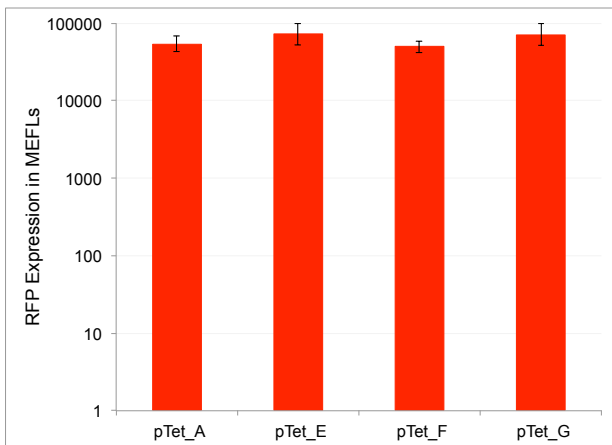

Source: https://storage.googleapis.com/plos-corpus-prod/10.1371/journal.pone.0176013/1/pone.0176013.s003.pdf
